# Supplementary material
Source: HighWire-hosted journal article supplement (https://bmjopen.bmj.com/content/7/10/e016307)
Supplement: inline-supplementary-material-2 [file inline-supplementary-material-2.pdf]

Supplementary file 2

A. Recruitment Flowchart

B. Characteristics of practices approached in Wave 1

A. Recruitment Flowchart

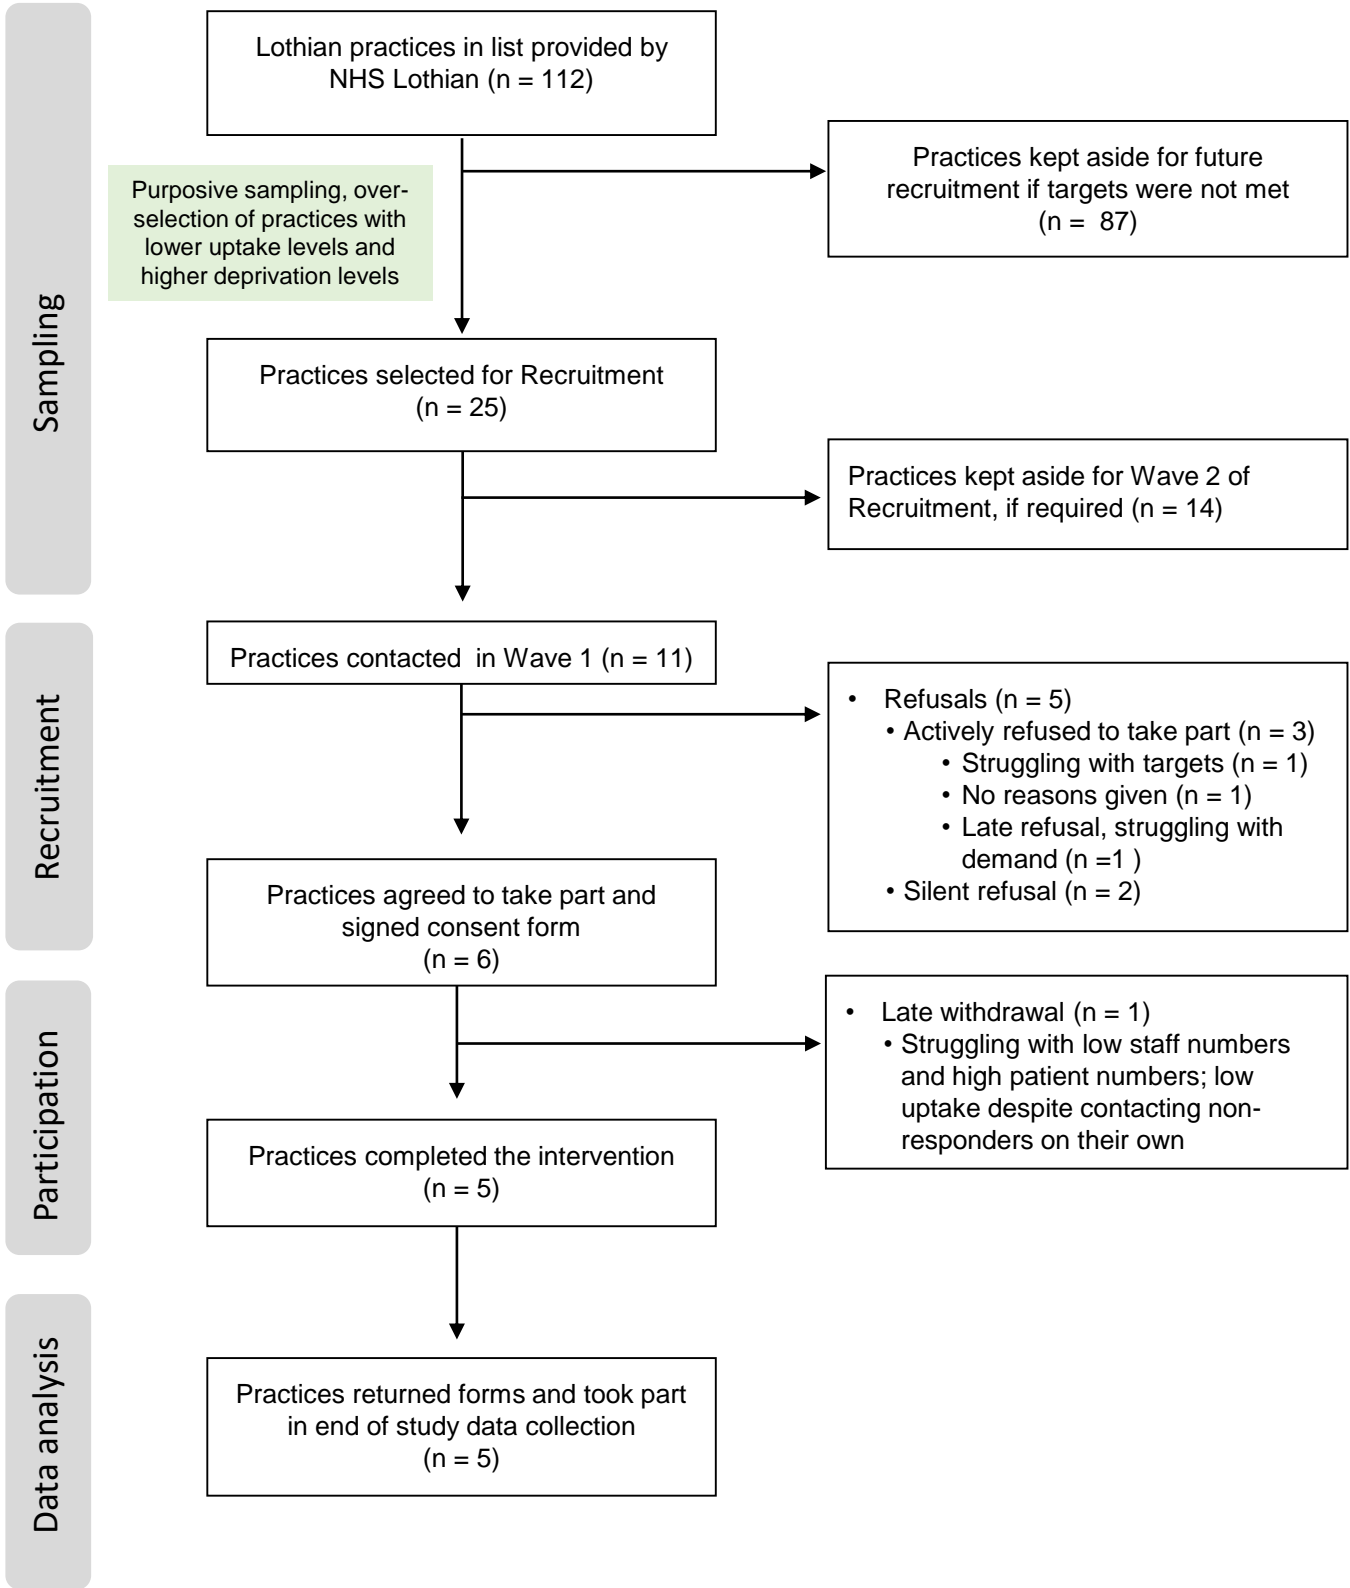

B. Characteristics of practices approached in Wave 1

| Practice name | Outcome in Wave 1 of recruitment                     | Uptake % (2013) | Pop 50-75 | Mean SIMD decile* (50-75yr olds) | Average Monthly Non Responder Numbers | Practice list size (ISD) |
|---------------|------------------------------------------------------|-----------------|-----------|----------------------------------|---------------------------------------|--------------------------|
| Practice A    | Recruited                                            | <45%            | 1,413     | 2.6                              | 41                                    | 6,888                    |
| Practice B    | Recruited                                            | 45-50%          | 2,654     | 3.6                              | 61                                    | 10,440                   |
| Practice C    | Recruited                                            | 50-55%          | 2,515     | 4.5                              | 56                                    | 8,693                    |
| Practice D    | Recruited                                            | 50-55%          | 1,241     | 6.2                              | 29                                    | 5,326                    |
| Practice E    | Recruited                                            | 55-60%          | 1,668     | 5.5                              | 30                                    | 5,201                    |
| Practice F    | Recruited, but withdrew as struggling with pressures | 50-55%          | 3,444     | 3.2                              | 73                                    | 11,624                   |
| Practice G    | Actively refused, struggling with pressures          | <45%            | 2,543     | 2.1                              | 70                                    | 12,482                   |
| Practice H    | Actively refused, struggling with pressures          | 45-50%          | 2,030     | 4.2                              | 47                                    | 9,585                    |
| Practice I    | Actively refused, no reasons given                   | 50-55%          | 3,809     | 4.6                              | 76                                    | 13,984                   |
| Practice J    | Silent refusal                                       | <45%            | 1,075     | 3.9                              | 29                                    | 7,848                    |
| Practice K    | Silent refusal                                       | 45-50%          | 2,241     | 3.4                              | 50                                    | 8,287                    |

Abbreviations: ISD: Information Services Division; Pop: population; SIMD: Scottish Index of Multiple Deprivation.

\*The lower the decile number, the higher the deprivation levels.
